# Supplementary material for: Beneficial effects of a new probiotic formulation on adipocytokines, appetite-regulating hormones, and metabolic parameters in obese women
Source: Royal Society of Chemistry journal article supplement (doi:10.1039/d4fo01269k), 2024-01-01
Supplement: d4fo01269k1.pdf [file d4fo01269k1.pdf]

| r/p          | CRP | IL-17 | IL-6  | TNF    | GRL    | ADN    | LPT    | TC     | HDL    | LDL    | TG     | GLU    | INS    | BMI    |
|--------------|-----|-------|-------|--------|--------|--------|--------|--------|--------|--------|--------|--------|--------|--------|
| <b>CRP</b>   | -   | 0.032 | 0.082 | 0.060  | 0.218  | -0.115 | -0.146 | -0.070 | 0.081  | -0.116 | 0.021  | 0.141  | -0.011 | 0.376  |
|              | -   | 0.926 | 0.717 | 0.790  | 0.329  | 0.611  | 0.516  | 0.770  | 0.735  | 0.626  | 0.930  | 0.531  | 0.966  | 0.085  |
| <b>IL-17</b> | -   | -     | 0.000 | 0.264  | 0.264  | -0.264 | 0.636  | 0.333  | 0.402  | 0.100  | -0.100 | -0.055 | -0.442 | -0.182 |
|              | -   | -     | 1.000 | 0.432  | 0.433  | 0.433  | 0.035  | 0.381  | 0.284  | 0.798  | 0.798  | 0.873  | 0.200  | 0.593  |
| <b>IL-6</b>  | -   | -     | -     | -0.326 | -0.329 | 0.081  | 0.586  | 0.106  | 0.091  | 0.010  | -0.068 | -0.125 | 0.000  | 0.331  |
|              | -   | -     | -     | 0.120  | 0.117  | 0.713  | 0.003  | 0.648  | 0.695  | 0.964  | 0.771  | 0.561  | 1.00   | 0.115  |
| <b>TNF-α</b> | -   | -     | -     | -      | 0.129  | -0.103 | -0.115 | 0.046  | 0.025  | 0.082  | 0.071  | 0.204  | -0.048 | 0.049  |
|              | -   | -     | -     | -      | 0.547  | 0.641  | 0.601  | 0.844  | 0.916  | 0.723  | 0.759  | 0.340  | 0.846  | 0.819  |
| <b>GRL</b>   | -   | -     | -     | -      | -      | 0.063  | -0.422 | -0.156 | 0.101  | -0.121 | 0.105  | -0.325 | -0.074 | 0.062  |
|              | -   | -     | -     | -      | -      | 0.774  | 0.045  | 0.500  | 0.664  | 0.602  | 0.650  | 0.121  | 0.764  | 0.773  |
| <b>ADN</b>   | -   | -     | -     | -      | -      | -      | -0.209 | -0.175 | 0.233  | -0.126 | -0.263 | -0.307 | 0.140  | -0.105 |
|              | -   | -     | -     | -      | -      | -      | 0.337  | 0.449  | 0.309  | 0.586  | 0.250  | 0.154  | 0.567  | 0.634  |
| <b>LPT</b>   | -   | -     | -     | -      | -      | -      | -      | 0.222  | 0.129  | 0.095  | -0.126 | -0.143 | -0.139 | 0.074  |
|              | -   | -     | -     | -      | -      | -      | -      | 0.333  | 0.576  | 0.683  | 0.586  | 0.514  | 0.571  | 0.738  |
| <b>TC</b>    | -   | -     | -     | -      | -      | -      | -      | -      | -0.064 | 0.933  | 0.464  | 0.163  | -0.025 | 0.154  |
|              | -   | -     | -     | -      | -      | -      | -      | -      | 0.784  | 0.000  | 0.034  | 0.480  | 0.926  | 0.505  |
| <b>HDL</b>   | -   | -     | -     | -      | -      | -      | -      | -      | -      | -0.236 | -0.619 | -0.185 | -0.833 | -0.215 |
|              | -   | -     | -     | -      | -      | -      | -      | -      | -      | 0.303  | 0.003  | 0.423  | 0.000  | 0.350  |
| <b>LDL</b>   | -   | -     | -     | -      | -      | -      | -      | -      | -      | -      | 0.529* | 0.217  | 0.054  | 0.118  |
|              | -   | -     | -     | -      | -      | -      | -      | -      | -      | -      | 0.014  | 0.344  | 0.837  | 0.612  |
| <b>TG</b>    | -   | -     | -     | -      | -      | -      | -      | -      | -      | -      | -      | 0.381  | 0.477  | 0.125  |
|              | -   | -     | -     | -      | -      | -      | -      | -      | -      | -      | -      | 0.089  | 0.053  | 0.590  |
| <b>GLU</b>   | -   | -     | -     | -      | -      | -      | -      | -      | -      | -      | -      | -      | 0.039  | -0.047 |
|              | -   | -     | -     | -      | -      | -      | -      | -      | -      | -      | -      | -      | 0.875  | 0.828  |
| <b>INS</b>   | -   | -     | -     | -      | -      | -      | -      | -      | -      | -      | -      | -      | -      | 0.366  |
|              | -   | -     | -     | -      | -      | -      | -      | -      | -      | -      | -      | -      | -      | 0.123  |
| <b>BMI</b>   | -   | -     | -     | -      | -      | -      | -      | -      | -      | -      | -      | -      | -      | -      |
|              | -   | -     | -     | -      | -      | -      | -      | -      | -      | -      | -      | -      | -      | -      |

**Table S1.** Correlations between analyzed parameters after the intervention

r – Spearman’s correlation factor.  $p \leq 0.05$ , statistical significance. GRL – ghrelin; AND - adiponectin; LPT – leptin; TC – total cholesterol; TG – triglycerides; GLU – glucose; INS – insulin;
